# Supplementary material for: Effects of surface functionality of carbon nanomaterials on short-term cytotoxicity and embryonic development in zebrafish
Source: Royal Society of Chemistry journal article supplement (doi:10.1039/c3tb21497d), 2013-12-05
Supplement: c3tb21497d.pdf [file c3tb21497d.pdf]

## Supplementary Information

### Effects of Surface Functionality of Carbon Nanomaterials on Short-Term Cytotoxicity and Embryonic Development in Zebrafish

Raviraj Vankayala<sup>1</sup>, Poliraju Kalluru<sup>1</sup>, Hsin-Hui Tsai<sup>1</sup>, Chi-Shiun Chiang<sup>2</sup>, and Kuo Chu Hwang<sup>1\*</sup>

<sup>1</sup>Department of Chemistry, <sup>2</sup>Department of Biomedical Engineering and Environmental Sciences, National Tsing Hua University, Hsinchu 30013, Taiwan

\*E-mail: [kchwang@mx.nthu.edu.tw](mailto:kchwang@mx.nthu.edu.tw)

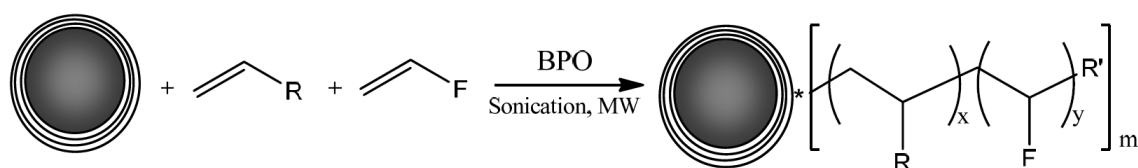

R = COOH, OH, NH<sub>2</sub>, Ph

F = Fluorescence moiety (Methacryloxyethyl thiocarbonyl rhodamine-B)

BPO = Benzoyl Peroxide

x, y = the number of repeat unit in polymer

m = the number of polymer attached on the surface of Fe@CNPs/NDs

x, y, m are variable number

**Figure S1** Schematic process for surface functionalization of carbon nanomaterials.

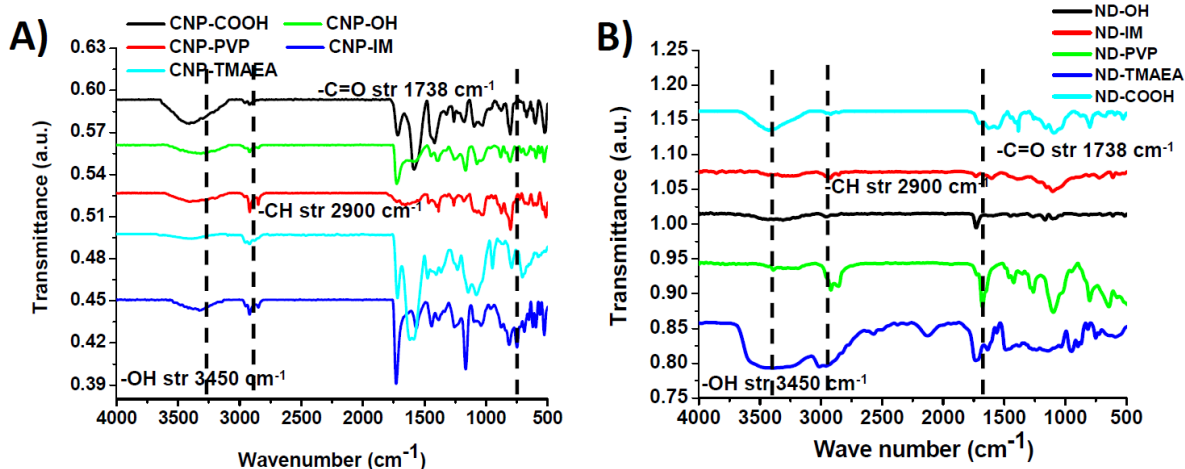

Figure S2. FT-IR spectra for various surface functionalized A) Fe@CNPs and B) NDs.

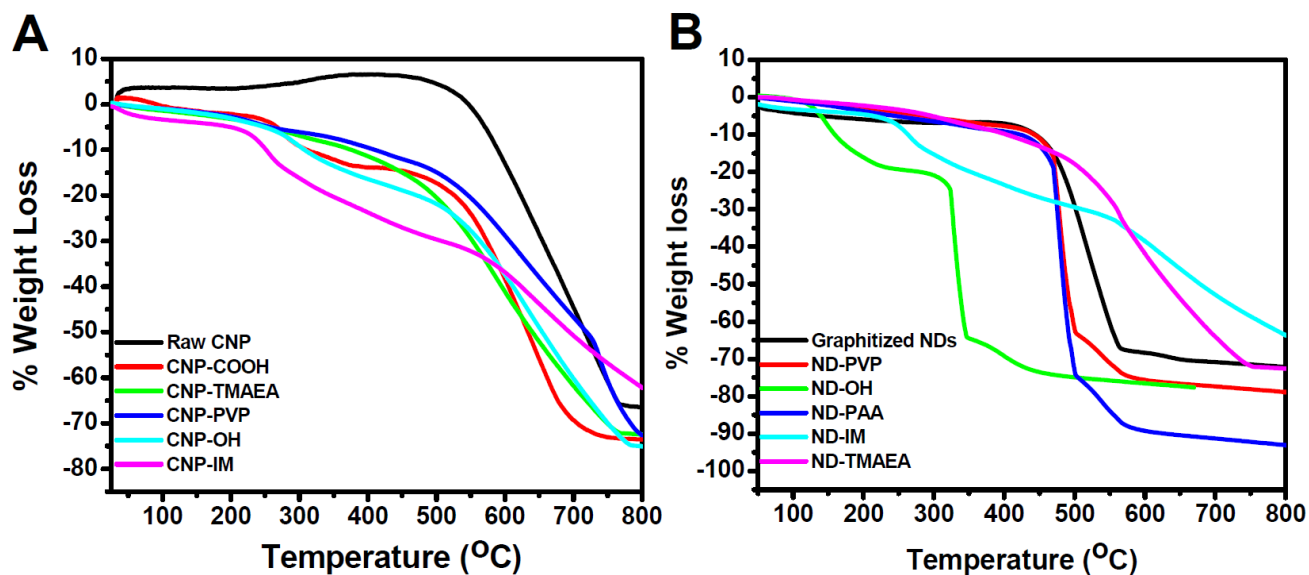

Figure S3. Thermogravimetric analyses of surface functionalized A) Fe@CNPs and B) NDs.

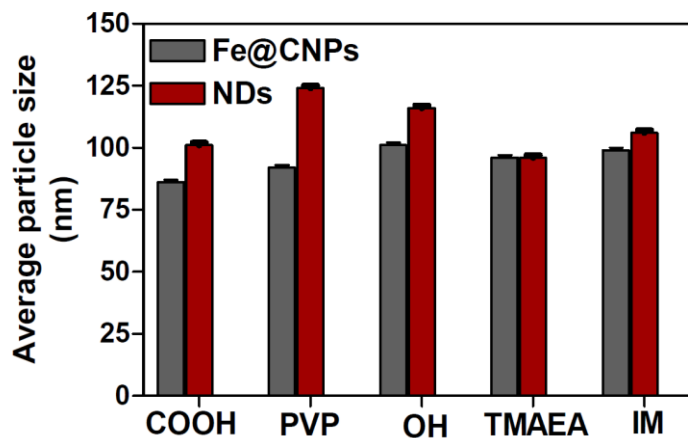

**Figure S4.** Dynamic light scattering (DLS) measurements for various surface-functionalized Fe@CNPs and NDs dispersed in DI water.

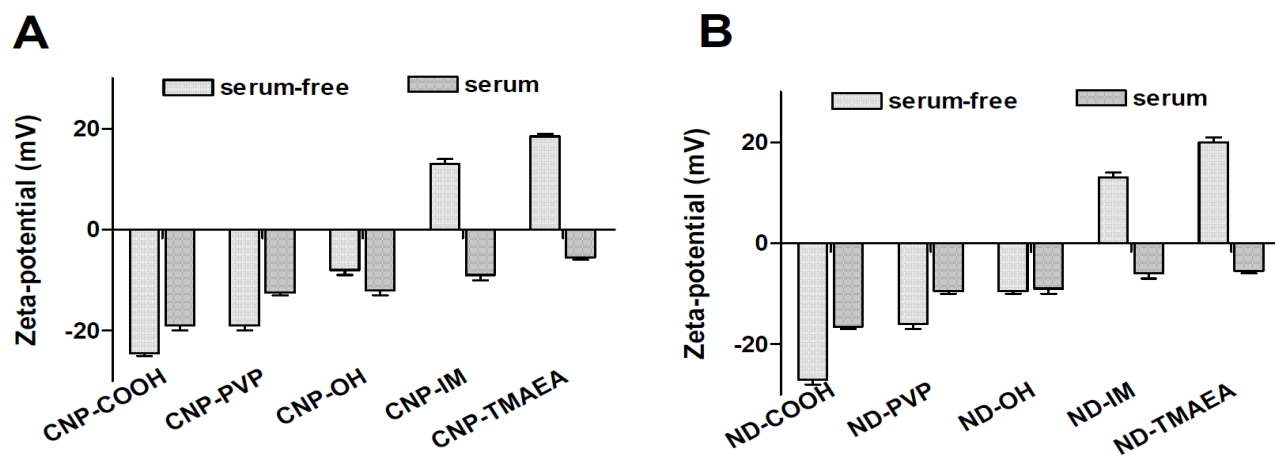

**Figure S5.** Zeta-potential values for various surface functionalized Fe@CNPs and NDs in the presence of serum and serum-free media.

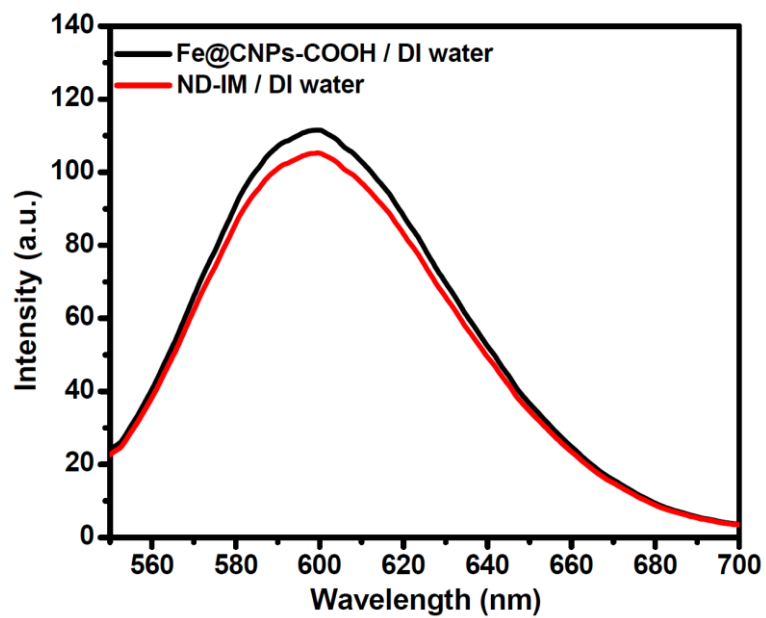

**Figure S6.** Photoluminescence (PL) spectra for Fe@CNPs-COOH and ND-IM conjugated with DR1 fluorescent dye. The spectra were recorded in DI water at an excitation wavelength of 488 nm.

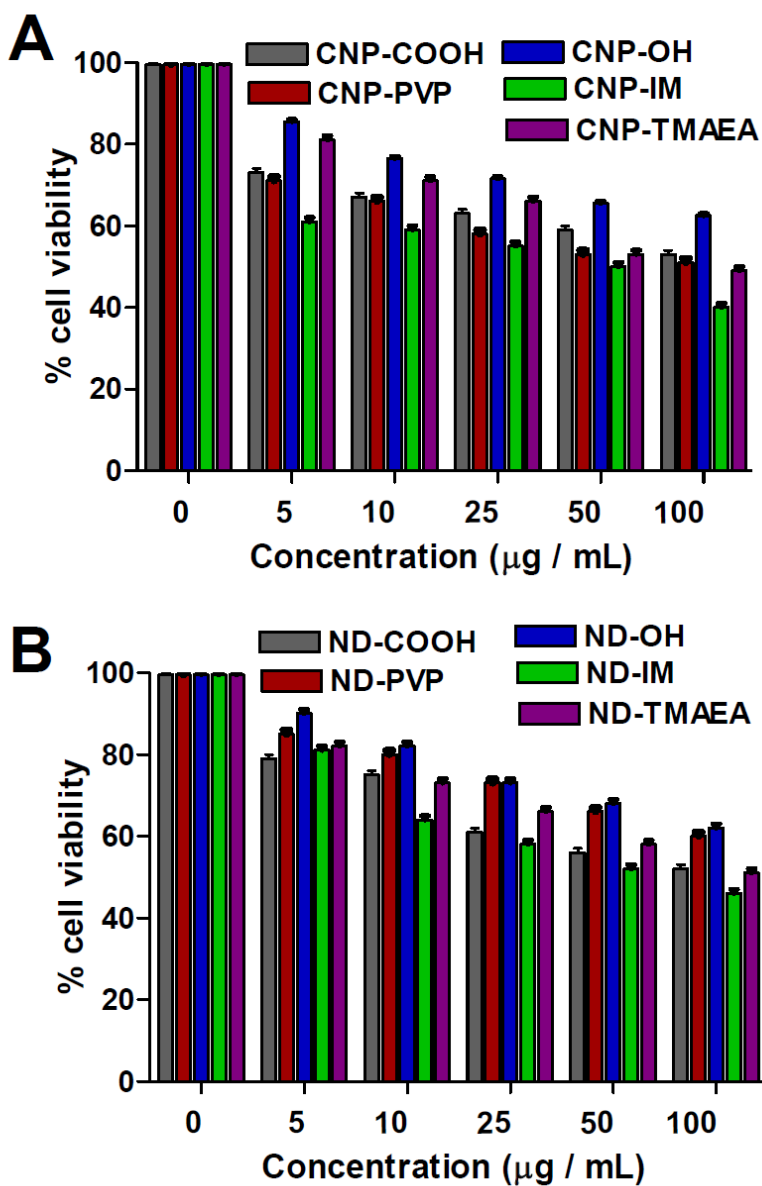

**Figure S7.** Cell viabilities of U-87MG cells after pretreatment with various surface functionalized (A) Fe@CNPs and (B) NDs respectively.

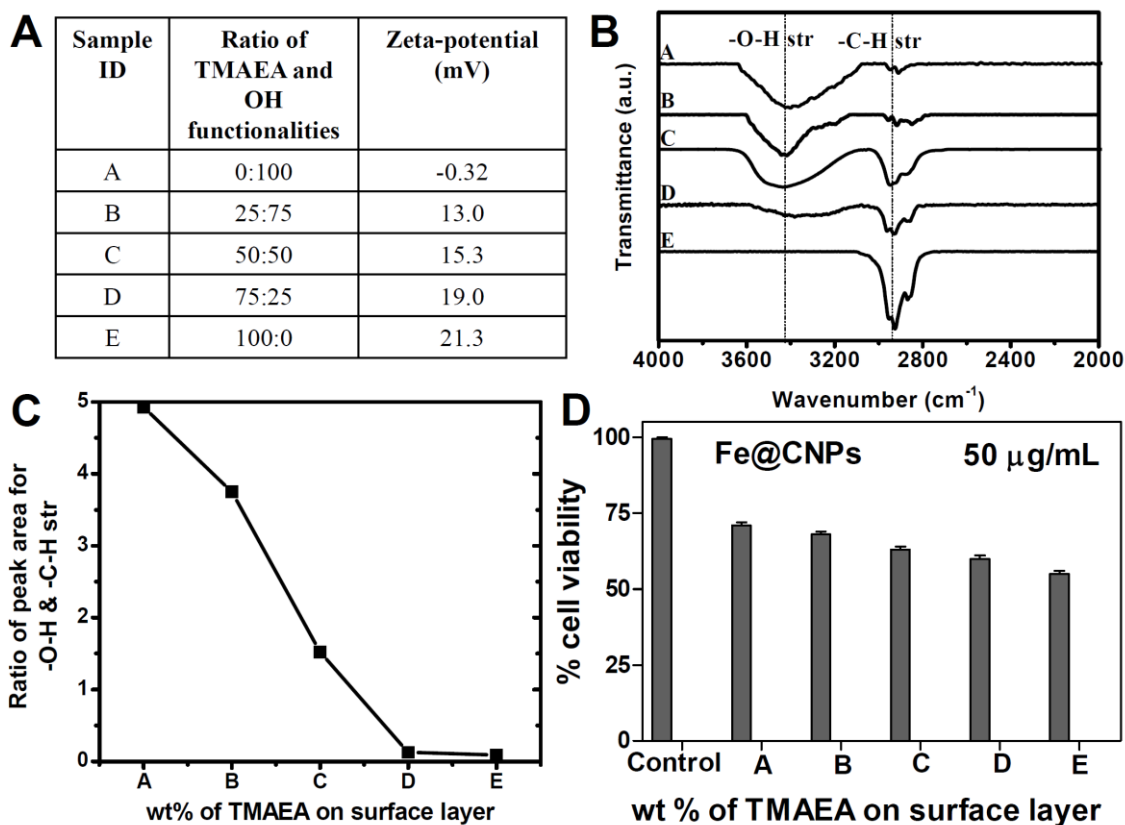

**Figure S8.** The surface of Fe@CNPs was co-functionalized with trimethyl ammonium ethyl methacrylate (TMAEA) and 2-hydroxy ethyl methacrylate (OH) with different weight ratios as indicated in the table of (A). (A) The weight ratio of TMAEA vs. OH and the zeta-potential values of surface-functionalized Fe@CNPs (B) FT-IR spectra for all the samples, and (C) changes in the ratio of the peak area for –O-H to the –C-H stretching as a function of wt% of TMAEA on surface layer, and (D) HeLa cell viabilities measured using MTT assay for different samples as shown in (A) at 50 µg/mL concentration.

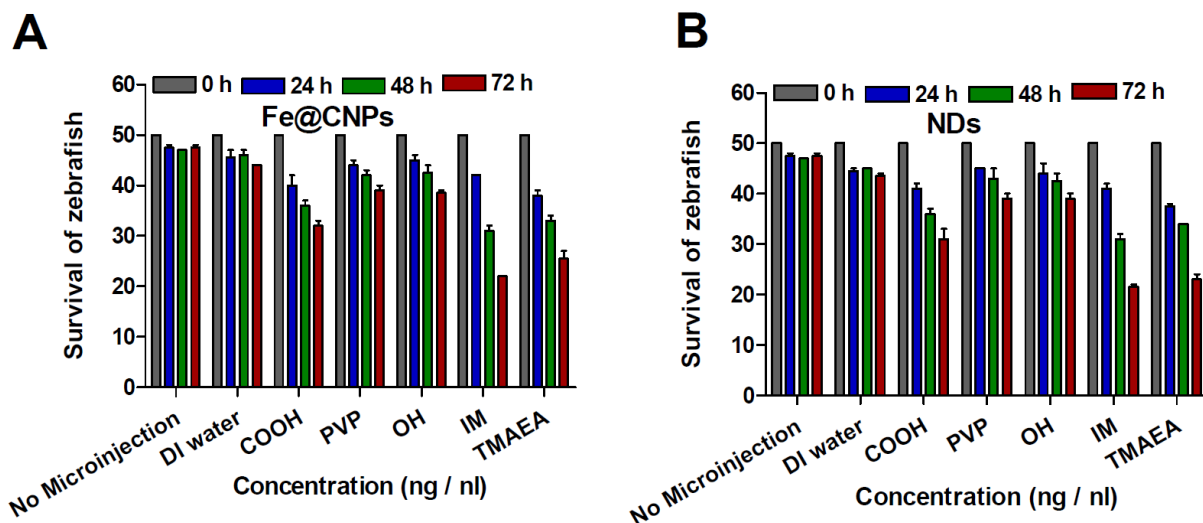

**Figure S9.** Biocompatibility of various surface functionalized (A) Fe@CNPs and (B) NDs in zebrafish. Survival rates were monitored after microinjection of nanoparticles at different hours post fertilization (hpf). The concentrations of surface functionalized Fe@CNPs and NDs are 0.06 ng /mL.
